# Supplementary material for: Positive Allosteric Modulators of SERCA Pump Restore Dendritic Spines and Rescue Long-Term Potentiation Defects in Alzheimer’s Disease Mouse Model
Source: MDPI journal article supplement (doi:10.3390/ijms241813973), 2023-09-12
Supplement: s1 [file s1]

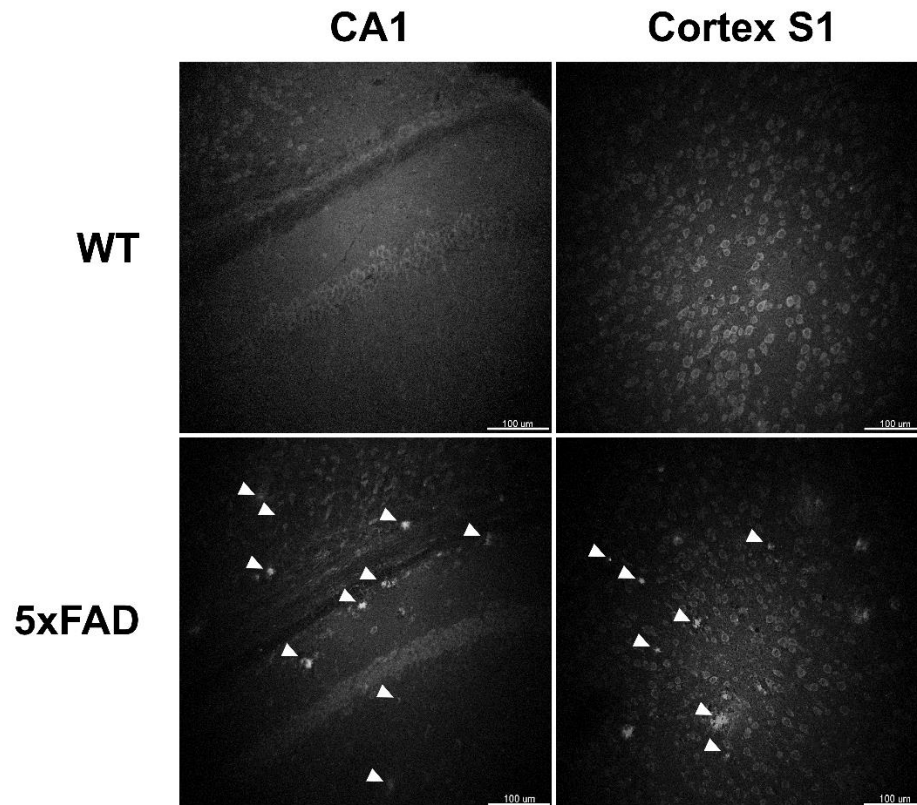

**Fig S1:** Representative images of amyloid plaques (indicated by white triangles) in the brains of 6-month-old 5xFAD and WT mice in the hippocampal CA1 region and the cortical S1 region. The slice thickness was 100  $\mu\text{m}$ , and images were captured at 20x magnification. The length of the scale bar segment is 100  $\mu\text{m}$ . For staining, an indirect immunohistochemical method was employed using primary antibodies against A $\beta$ -peptide (6E10, 1:500, Biolegend, #SIG-39320) and secondary antibodies Alexa Fluor-488 (1:1000, ThermoFisher Scientific, #A-11001).
